# Supplementary material for: A ratiometric fluorescence probe for imaging sulfur dioxide derivatives in the mitochondria of living cells
Source: Royal Society of Chemistry journal article supplement (doi:10.1039/c6ob02779b), 2017-01-01
Supplement: c6ob02779b1.pdf [file c6ob02779b1.pdf]

Supplementary information for:

## **A Ratiometric Fluorescence Probe for Imaging of Sulfur Dioxide Derivatives in Mitochondria of Living Cells**

Yongfei Wang,<sup>a</sup> Qingtao Meng,<sup>a</sup> Run Zhang,<sup>a, b, \*</sup> Hongmin Jia,<sup>a</sup> Xuehu Zhang,<sup>a</sup> and Zhiqiang Zhang,<sup>a, \*</sup>

a. School of Chemical Engineering, University of Science and Technology Liaoning, 185 Qianshan Zhong Road, Anshan 114044, P. R. China

E-mail: zhangzhiqiang@ustl.edu.cn, Tel: +86-412-5928009

b. Australian Institute for Bioengineering and Nanotechnology, The University of Queensland, Brisbane, 4072, Australia

E-mail: r.zhang@uq.edu.au, Tel: +61-7- 33463806

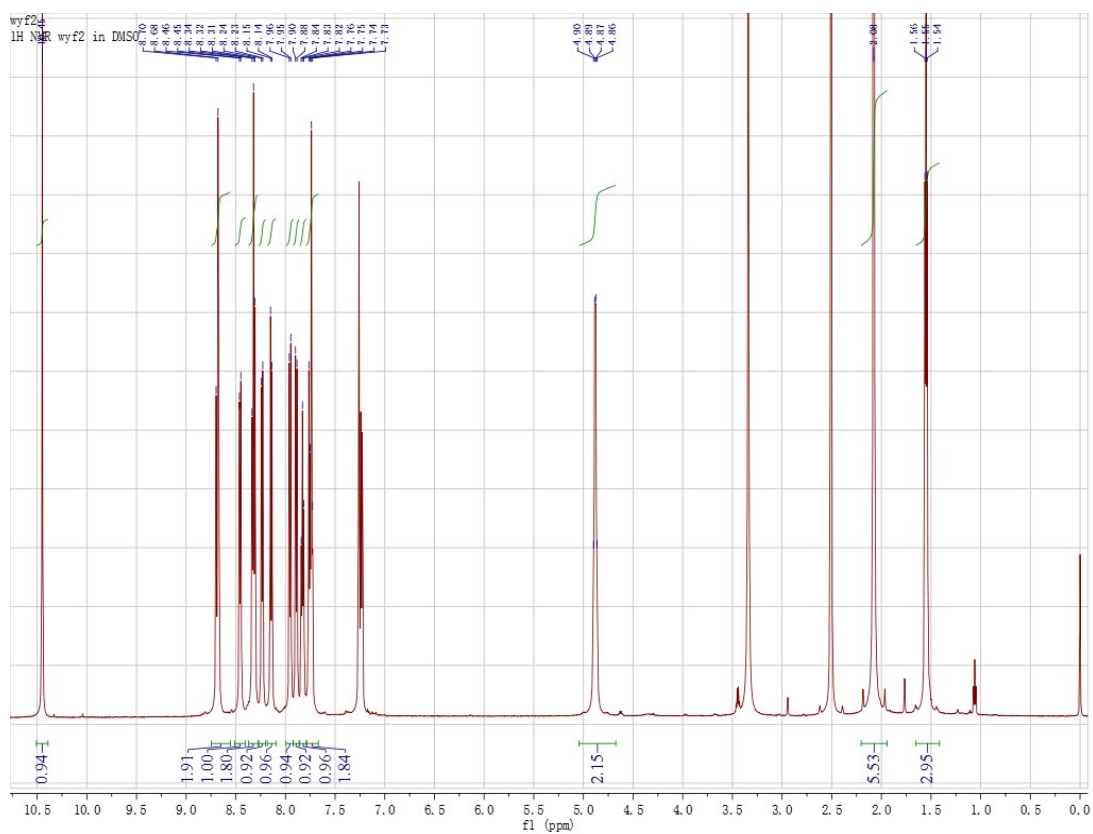

Figure S1. <sup>1</sup>H NMR spectral of probe NBD-Id.

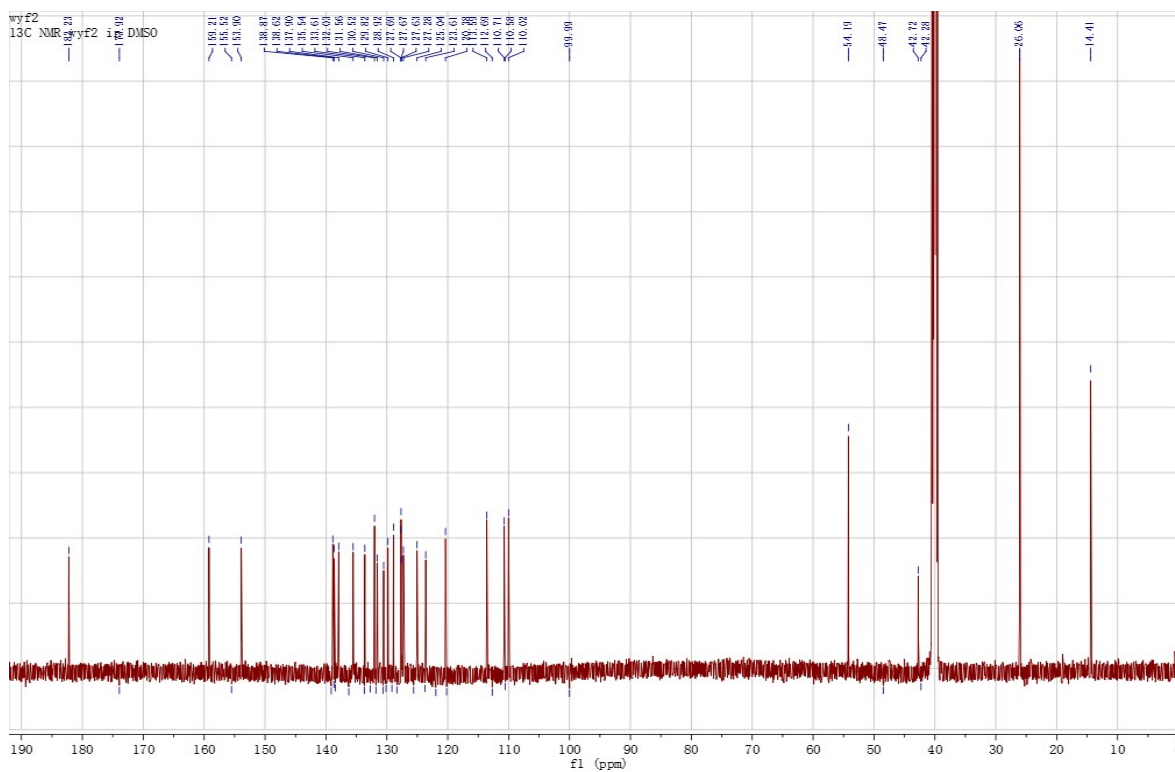

Figure S2. <sup>13</sup>C NMR spectral of probe NBD-Id

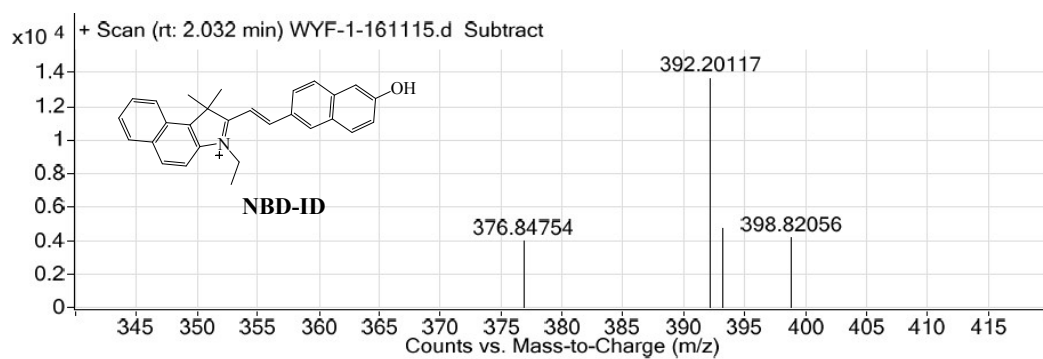

**Figure S3.** ESI-HRMS spectra of **NBD-Id**.

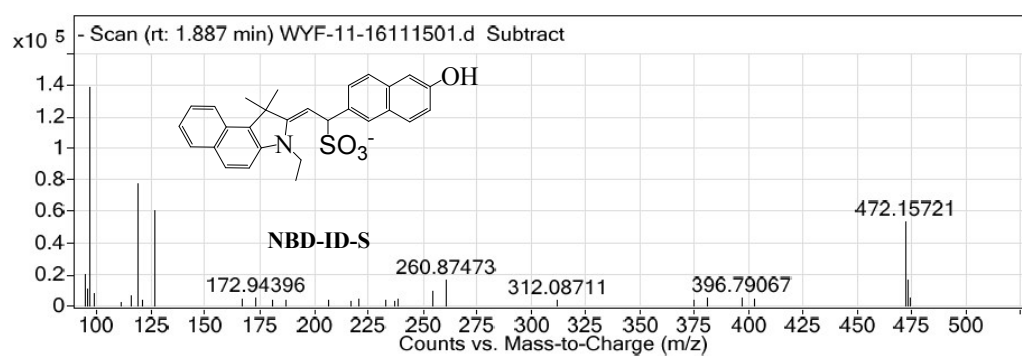

**Figure S4.** ESI-HRMS spectra of the reaction solution of  $\text{HSO}_3^-$  and **NBD-Id**.

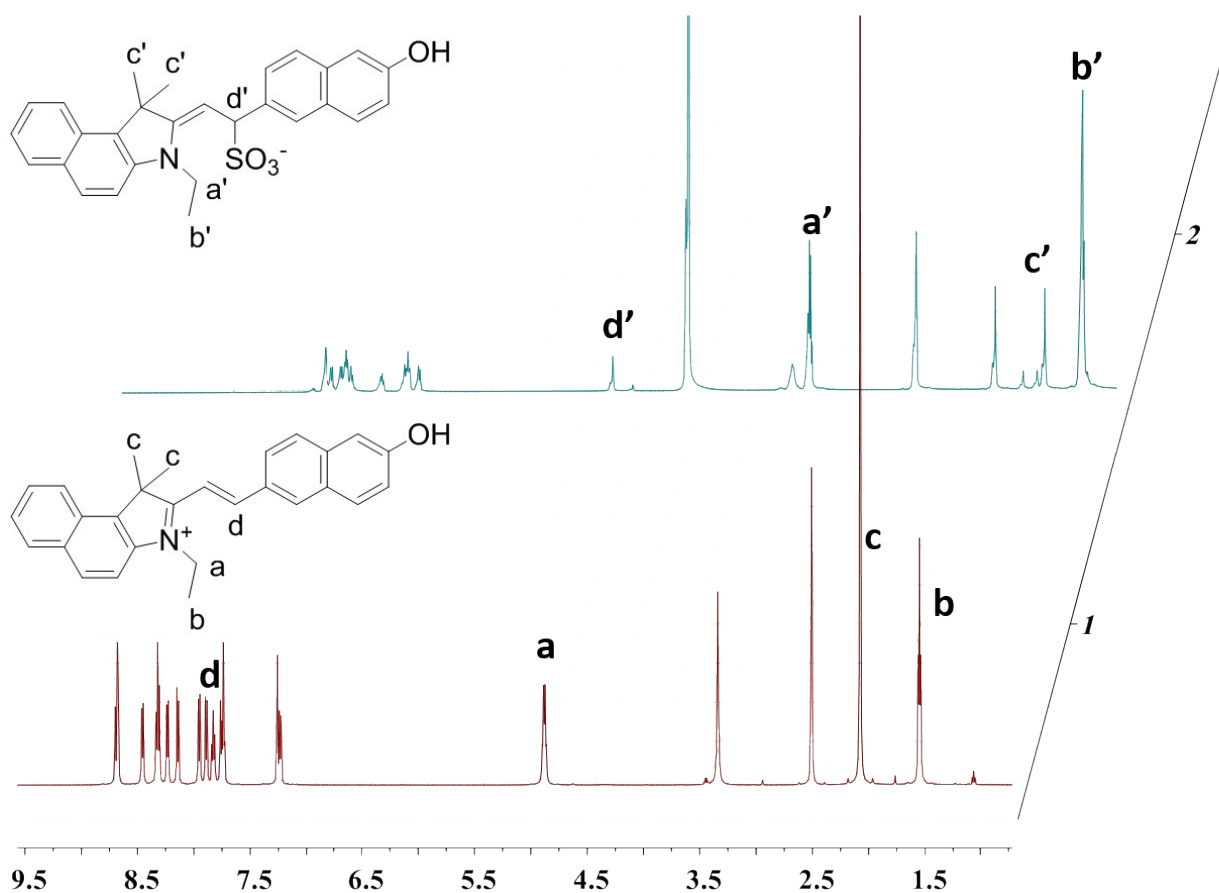

**Figure S5.** Changes in  $^1\text{H}$ NMR spectral of NBD-Id in the absence and presence of  $\text{NaHSO}_3$  in  $\text{DMSO-D}_6/\text{D}_2\text{O} = 1:1$  (v/v).

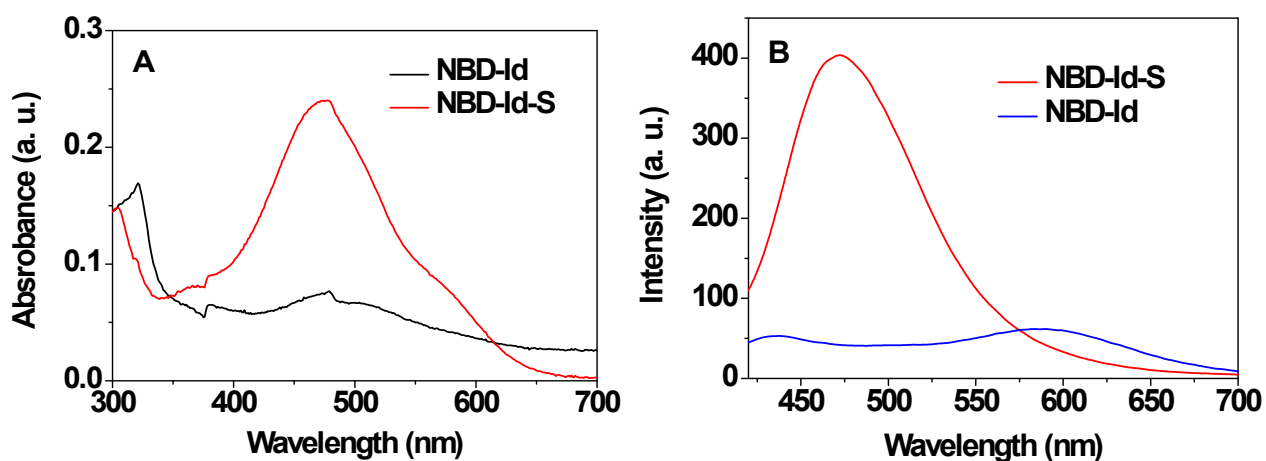

**Figure S6.** Absorption (A) and fluorescence (B) spectra of NBD-Id and NBD-Id-S.

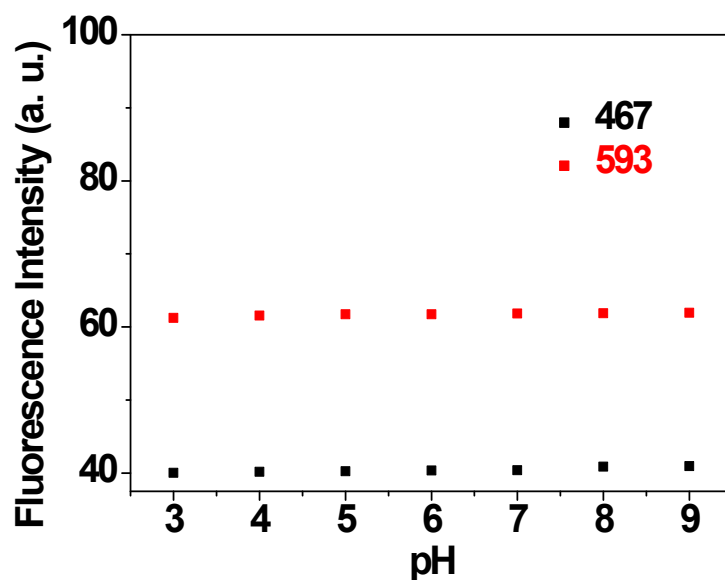

**Figure S7.** Fluorescence intensity of **NBD-Id** (10  $\mu\text{M}$ ) at  $\lambda_{\text{em}} = 467 \text{ nm}$  (■), and  $\lambda_{\text{em}} = 593 \text{ nm}$  (■) in PBS buffer with different pH level.

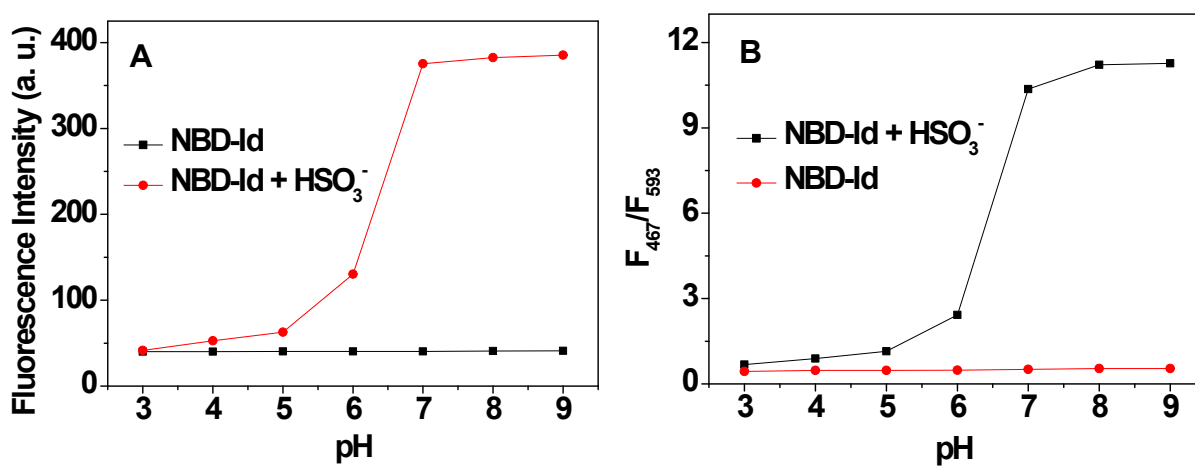

**Figure S8.** Effects of pH on the fluorescence response of **NBD-Id** (10  $\mu\text{M}$ ) towards  $\text{HSO}_3^-$  (5.0 equiv.) at  $\lambda_{\text{em}} = 467 \text{ nm}$  (A), and  $F_{467}/F_{593}$  (B) in PBS buffer.
